# Supplementary material for: Diketopyrrolopyrrole-based conjugated polymers synthesized by direct arylation polycondensation for anisole-processed high mobility organic thin-film transistors
Source: Royal Society of Chemistry journal article supplement (doi:10.1039/d1tc04207f), 2021-10-08
Supplement: d1tc04207f1.pdf [file d1tc04207f1.pdf]

Electronic supplementary information *for*

**Diketopyrrolopyrrole-based conjugated polymers synthesized by direct arylation  
polycondensation for anisole-processed high mobility organic thin-film transistors**

Ying Sui,<sup>a,b</sup> Zhongli Wang,<sup>a</sup> Junhua Bai,<sup>a</sup> Yibo Shi,<sup>a</sup> Xuwen Zhang,<sup>a</sup> Yunfeng Deng,<sup>\*a</sup>

Yang Han,<sup>a</sup> Yanhou Geng<sup>\*a,c</sup>

<sup>a</sup>School of Materials Science and Engineering and Tianjin Key Laboratory of Molecular  
Optoelectronic Science, Tianjin University, Tianjin 300072, P. R. China.

<sup>b</sup>School of Materials Science and Engineering, Tianjin Chengjian University, Tianjin  
300384, P. R. China.

<sup>c</sup>Joint School of National University of Singapore and Tianjin University, International  
Campus of Tianjin University, Fuzhou 350207, China.

E-mail: [yunfeng.deng@tju.edu.cn](mailto:yunfeng.deng@tju.edu.cn); [yanhou.geng@tju.edu.cn](mailto:yanhou.geng@tju.edu.cn)

## General methods

$^1\text{H}$  NMR and  $^{13}\text{C}$  NMR spectra were recorded using a Bruker AVANCE III (400 MHz for  $^1\text{H}$  NMR and 100 MHz for  $^{13}\text{C}$  NMR) spectrometer in chloroform-*d* ( $\text{CDCl}_3$ ) at 25  $^\circ\text{C}$ . High resolution matrix-assisted laser desorption ionization time-of-flight (MALDI-TOF) mass spectra were recorded on a Bruker/AutoflexIII Smartbean MALDI mass spectrometer using 2-[(2*E*)-3-(4-*t*-buthylphenyl)-2-methylprop-2-enylidene]malononitrile (DCTB) as the matrix in a reflection mode. Elemental analysis was performed on a FlashEA1112 elemental analyser. High temperature gel permeation chromatography (HT-GPC) analysis was conducted on a PL-GPC 220 system at 150  $^\circ\text{C}$  with 1,2,4-trichlorobenzene as the eluent and polystyrene as the standard. Thermogravimetric analysis (TGA) was conducted on a TA Q50 thermogravimetric analyser under nitrogen flow with the heating rate of 10  $^\circ\text{C min}^{-1}$ . Differential scanning calorimetry (DSC) was carried out on a TA Q25 instrument with a heating/cooling rate of 10  $^\circ\text{C min}^{-1}$  under nitrogen flow. UV-*vis*-NIR absorption spectra were recorded by Shimadzu UV-3600Plus spectrometer. Solution spectra were measured in anisole, *o*-xylene or 1,2-dichlorobenzene (*o*-DCB) with a concentration of  $1\times 10^{-5}$  mol  $\text{L}^{-1}$ , and films were prepared by spin-coating the anisole, *o*-xylene and *o*-DCB solutions on quartz substrates. Film cyclic voltammetry (CV) measurement was performed on a CHI660E electrochemical analyser with a three-electrode cell at a scan rate of 100 mV  $\text{s}^{-1}$  in anhydrous acetonitrile. A glassy carbon electrode with a diameter of 6 mm, a Pt wire, and a saturated calomel electrode (SCE) were used as the working, counter, and reference electrodes, respectively. Tetrabutylammonium hexafluorophosphate

(Bu<sub>4</sub>NPF<sub>6</sub>, 0.1 mol L<sup>-1</sup>) was used as the supporting electrolyte. In plane and out of plane X-ray diffraction (XRD) of the films were measured by a Rigaku Smart Lab with Cu K<sub>α</sub> source ( $\lambda = 1.54056 \text{ \AA}$ ) in air. Atomic force microscopy (AFM) measurements were performed in tapping mode on a Bruker MultiMode 8 instrument.

### **Fabrication and characterization of organic thin-film transistors (OTFTs)**

The silicon wafers with a 300 nm thick SiO<sub>2</sub> layer were washed by an ultrasonic cleaner with deionized water, acetone and isopropanol, then dried under a nitrogen flow and heated at 120 °C for 10 min. Au (30 nm) was vacuum-evaporated on the substrate as the source and drain electrodes with an interdigitated electrode pattern (W/L = 70, W = 5600  $\mu\text{m}$ , L = 80  $\mu\text{m}$ ). For PEIE-modified OTFTs, the pre-patterned substrates were treated with UV-zone for 15 min, and 0.08 wt% PEIE solution (prepared by diluting 37 wt% PEIE water solution with 2-methoxyethanol) was spin-coated at 5000 rpm for 60 s, followed by thermal annealing at 100 °C for 10 min. Subsequently, the semiconductor films were prepared by spin-coating at 1000 rpm or bar-coating on the hot stage of 100 °C from polymer solutions (3.0 mg mL<sup>-1</sup>) with anisole, *o*-xylene and *o*-DCB as solvent, respectively, followed by thermal annealing at 200 °C for 10 min. During bar-coating, the conjugated polymer solution with a confined volume was spread over the substrate with a coating speed of 40 mm s<sup>-1</sup>. The term “parallel” is defined as when the bar-coating direction is parallel to the source-drain field. After that, poly(methyl methacrylate) (PMMA,  $M_w = 120 \text{ kDa}$ ) solution (80 mg mL<sup>-1</sup>, butyl acetate) was spin-coated on the top of semiconductor layer as the dielectric layer (~600 nm) at 1300 rpm, then annealed at 100 °C for 40 min. Finally, Al (80 nm) was vacuum-



anhydrous potassium carbonate ( $\text{K}_2\text{CO}_3$ ) (1.37 g, 9.9 mmol) and 18-crown-6-ether (10.0 mg, 37.8  $\mu\text{mol}$ ) were dissolved in anhydrous DMF (40 mL) in a threenecked flask. The mixture was stirred at 120 °C for 12 h. After removal of the solvent, the residue was dissolved in dichloromethane, and washed with brine. The combined organic phase was dried over anhydrous  $\text{MgSO}_4$  and concentrated under reduced pressure. The residue was purified by chromatography (silica gel, dichloromethane: petroleum ether = 1:1) to give compound **2** as a dark red solid (3.47 g, yield: 90%).  $^1\text{H}$  NMR (400 MHz,  $\text{CDCl}_3$ ,  $\delta$ ): 8.31 (d,  $J$  = 3.6 Hz, 2H), 7.62 (d,  $J$  = 1.6 Hz, 2H), 6.70 (dd,  $J$  = 3.6, 1.6 Hz, 2H), 4.08 (t,  $J$  = 7.6 Hz, 4H), 1.71-1.60 (m, 4H), 1.45-1.06 (m, 110H), 0.88 (t,  $J$  = 6.8 Hz, 12H). Elemental Anal. calcd. for  $\text{C}_{78}\text{H}_{136}\text{N}_2\text{O}_4$ : C 80.35, H 11.76, N 2.40; Found: C 81.16, H 11.08, N 2.46; HRMS (MALDI-TOF)  $m/z$ : calcd. for  $\text{C}_{78}\text{H}_{136}\text{N}_2\text{O}_4$ : 1165.0500; Found.1165.0501.

3,6-Bis(5-bromofuran-2-yl)-2,5-bis(4-tetradecyloctadecyl)-pyrrolo[3,4-*c*]pyrrole-1,4(2*H*,5*H*)-dione (**FDPP-Br**): To a solution of compound **2** (1.55 g, 1.3 mmol) in chloroform (50 mL), *N*-bromosuccinimide (NBS) (521.3 mg, 2.9 mmol) was added slowly at 0 °C. The mixture was stirred at room temperature for 6 h in the absence of light. After removal of the solvent, the residue was purified by chromatography (silica gel, dichloromethane: petroleum ether = 1:1) to give **FDPP-Br** as a dark red solid (1.20 g, yield: 68%).  $^1\text{H}$  NMR (400 MHz,  $\text{CDCl}_3$ ,  $\delta$ ): 8.26 (d,  $J$  = 3.6 Hz, 2H), 6.63 (d,  $J$  = 3.6 Hz, 2H), 4.02 (t,  $J$  = 7.6 Hz, 4H), 1.71-1.60 (m, 4H), 1.45-1.06 (m, 110H), 0.88 (t,  $J$  = 6.8 Hz, 12H);  $^{13}\text{C}$  NMR (100 MHz,  $\text{CDCl}_3$ ,  $\delta$ ): 160.48, 146.18, 132.52, 126.44, 122.13, 115.53, 106.27, 42.89, 37.21, 33.60, 31.95, 30.63, 30.12, 29.73, 29.69, 29.40,

27.44, 26.69, 22.72, 14.15. Elemental Anal. calcd. for  $C_{78}H_{134}Br_2N_2O_4$ : C 70.77, H 10.20, N 2.12; Found: C 71.63, H 9.69, N 2.13; HRMS (MALDI-TOF)  $m/z$ : calcd. for  $C_{78}H_{134}Br_2N_2O_4$ : 1322.8690; Found: 1322.8708.

**Fu-F: FDPP-Br** (154.3 mg, 116.6  $\mu$ mol, 1 eq.), **4FTVT** (30.8 mg, 116.6  $\mu$ mol, 1 eq.), Herrmann's catalyst (2.2 mg, 2.3  $\mu$ mol, 2 mol%),  $P(o\text{-MeOPh})_3$  (1.6 mg, 4.6  $\mu$ mol, 4 mol%), PivOH (11.9 mg, 116.6  $\mu$ mol, 1 eq.) and  $Cs_2CO_3$  (113.9 mg, 349.7  $\mu$ mol, 3 eq.) were added into a pressure-proof-tube. The tube was sealed with a cap after anhydrous toluene (11.7 mL) was added in a glovebox. The mixture was stirred at 120  $^{\circ}C$  for 24 h. After cooling to room temperature, the mixture was precipitated in methanol. The precipitate was collected by filtration and purified by Soxhlet extraction with ethanol, acetone and hexane in succession. The remaining solid dissolved in *o*-DCB, and filtered by 0.45  $\mu$ m filter. **Fu-F** was obtained as a black solid by precipitating the *o*-DCB solution in methanol, filtrated, and then dried in a vacuum (90%). GPC:  $M_n$  = 37.2 kDa,  $D$  = 2.1. Elemental Anal. Calcd. for  $(C_{88}H_{138}F_4N_2O_4S_4)_n$ : C 74.01, H 9.74, N 1.96, S 4.49; Found: C 73.54, H 9.88, N 2.07, S 4.35.

**Fu-Cl: Fu-Cl** was obtained as a black solid (171.8 mg, yield 82%) from **FDPP-Br** (185.7 mg, 140.3  $\mu$ mol, 1 eq.), **4CITVT** (46.3 mg, 140.3  $\mu$ mol, 1 eq.), Herrmann's catalyst (2.6 mg, 2.8  $\mu$ mol, 2 mol%),  $P(o\text{-MeOPh})_3$  (2.0 mg, 5.6  $\mu$ mol, 4 mol%), PivOH (14.3 mg, 140.3  $\mu$ mol, 1 eq.) and  $Cs_2CO_3$  (137.1 mg, 420.8  $\mu$ mol, 3 eq.) in toluene (7.0 mL) following the same procedure for the synthesis of **Fu-F**. GPC:  $M_n$  = 63.0 kDa,  $D$  = 2.3. Elemental Anal. Calcd. for  $(C_{88}H_{138}Cl_4N_2O_4S_2)_n$ : C 70.75, H 9.31, N 1.88, S 4.29; Found: C 69.38, H 9.47, N 2.02, S 4.35.

## Supplementary data

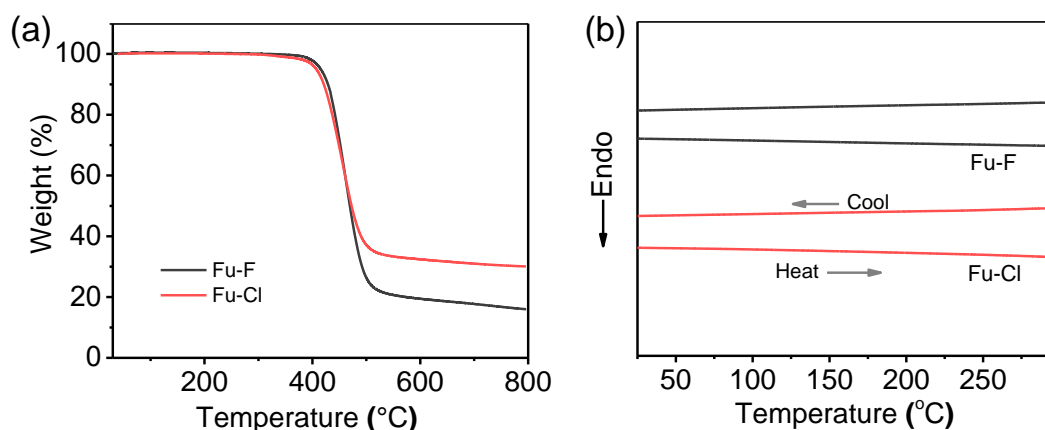

**Figure S1.** TGA (a) and DSC (b) curves of the polymers.

**Table S1.** Solubility of the polymers.

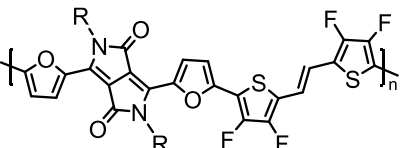

**Fu-F**  
 $M_n$ : 37.2 kDa,  $\bar{D}$ : 2.1



**Fu-Cl**  
 $M_n$ : 63.0 kDa,  $\bar{D}$ : 2.3



**Th-F**  
 $M_n$ : 30.1 kDa,  $\bar{D}$ : 2.9



**Th-Cl**  
 $M_n$ : 70.6 kDa,  $\bar{D}$ : 2.0

$R = \text{---} \text{C}_{14}\text{H}_{29} \text{---} \text{C}_{14}\text{H}_{29} \text{---}$

| solvent                         |               | anisole |       |      |       | <i>o</i> -xylene |       |      |       | <i>o</i> -DCB |       |      |       |
|---------------------------------|---------------|---------|-------|------|-------|------------------|-------|------|-------|---------------|-------|------|-------|
| conc.<br>(mg mL <sup>-1</sup> ) | temp.<br>(°C) | Fu-F    | Fu-Cl | Th-F | Th-Cl | Fu-F             | Fu-Cl | Th-F | Th-Cl | Fu-F          | Fu-Cl | Th-F | Th-Cl |
| 10                              | 100           | +       | +     | -    | -     | +                | +     | +    | +     | +             | +     | +    | +     |
|                                 | 70            | +       | -     | -    | -     | +                | +     | +    | +     | +             | +     | +    | +     |
|                                 | 25            | -       | -     | -    | -     | +                | +     | -    | -     | +             | +     | +    | +     |
| 5                               | 100           | +       | +     | -    | -     | +                | +     | +    | +     | +             | +     | +    | +     |
|                                 | 70            | +       | +     | -    | -     | +                | +     | +    | +     | +             | +     | +    | +     |
|                                 | 25            | -       | -     | -    | -     | +                | +     | +    | +     | +             | +     | +    | +     |

+ Soluble; - insoluble.

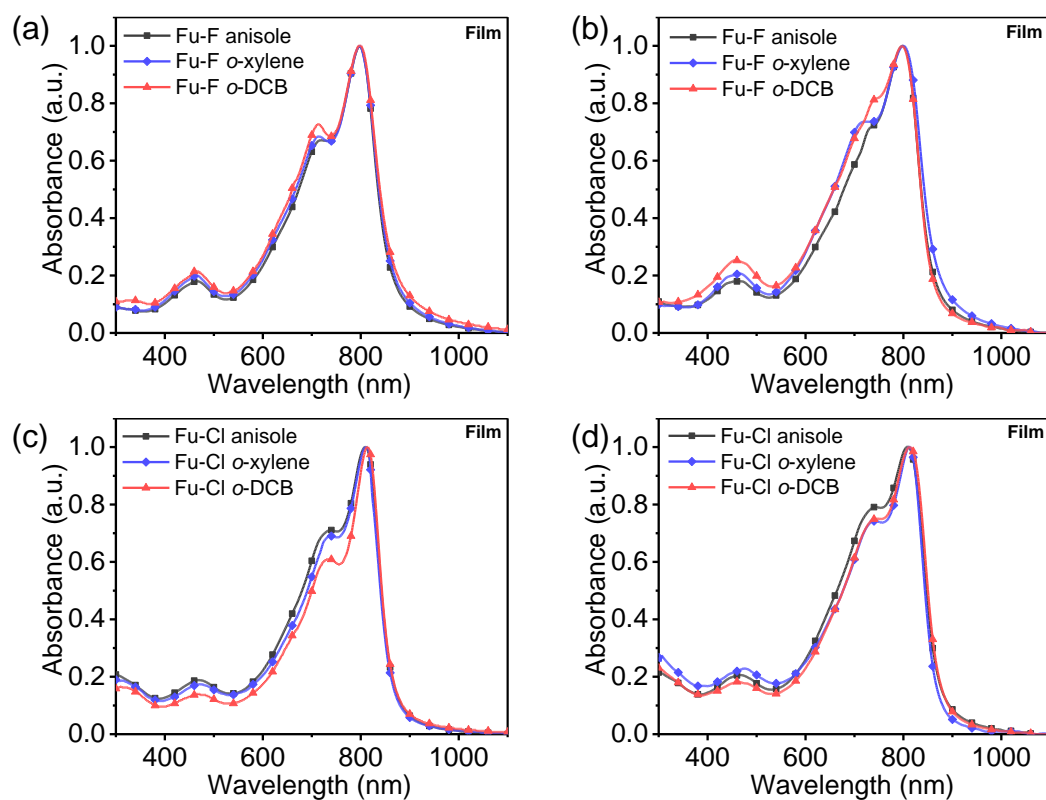

**Figure S2.** Film UV-vis-NIR absorption spectra of **Fu-F** (a, b) and **Fu-Cl** (c, d). Films were prepared by spin-coating the anisole, *o*-xylene and *o*-DCB solutions on quartz substrates with (b, d) and without (a, c) thermal annealing at 200 °C.



**Table S2.** Optical properties of the polymer films.

| polymer      | anisole                               |                                       | <i>o</i> -xylene                      |                                       | <i>o</i> -DCB                         |                                       |
|--------------|---------------------------------------|---------------------------------------|---------------------------------------|---------------------------------------|---------------------------------------|---------------------------------------|
|              | $\lambda_{\max}^{\text{film a}}$ (nm) | $\lambda_{\max}^{\text{film b}}$ (nm) | $\lambda_{\max}^{\text{film a}}$ (nm) | $\lambda_{\max}^{\text{film b}}$ (nm) | $\lambda_{\max}^{\text{film a}}$ (nm) | $\lambda_{\max}^{\text{film b}}$ (nm) |
| <b>Fu-F</b>  | 719,799                               | 731,799                               | 713,797                               | 718,799                               | 713,799                               | 740,798                               |
| <b>Fu-Cl</b> | 735,810                               | 742,810                               | 737,811                               | 740,812                               | 733,814                               | 743,813                               |

<sup>a</sup> The absorption maxima of the pristine films. <sup>b</sup> The absorption maxima of the films after thermal annealing at 200 °C for 10 min.

**Table S3.** The performance of spin-coated OTFT devices of the polymers<sup>a</sup>.

| polymer      | $T_A^b$<br>(°C) | without modification                                                                         |                |                                  |                                                                                              |                |                                  | with PEIE modification                                                                                    |                |                                  |
|--------------|-----------------|----------------------------------------------------------------------------------------------|----------------|----------------------------------|----------------------------------------------------------------------------------------------|----------------|----------------------------------|-----------------------------------------------------------------------------------------------------------|----------------|----------------------------------|
|              |                 | n-channel                                                                                    |                |                                  | p-channel                                                                                    |                |                                  | n-channel                                                                                                 |                |                                  |
|              |                 | $\mu_{e,\max}^c$ ( $\mu_{e,\text{avg}}^d$ )<br>( $\text{cm}^2 \text{V}^{-1} \text{s}^{-1}$ ) | $V_T^e$<br>(V) | $I_{\text{on}}/I_{\text{off}}^f$ | $\mu_{h,\max}^g$ ( $\mu_{h,\text{avg}}^h$ )<br>( $\text{cm}^2 \text{V}^{-1} \text{s}^{-1}$ ) | $V_T^e$<br>(V) | $I_{\text{on}}/I_{\text{off}}^f$ | $\mu_{e,\max}^c$ ( $\mu_{e,\text{avg}}^d$ )<br>( $\text{cm}^2 \text{V}^{-1} \text{s}^{-1}$ )<br>$r^i$ (%) | $V_T^e$<br>(V) | $I_{\text{on}}/I_{\text{off}}^f$ |
| <b>Fu-F</b>  | 150             | $2.8 \times 10^{-3}$ ( $1.7 \times 10^{-3}$ )                                                | 33~39          | $10^2 \sim 10^3$                 | $7.1 \times 10^{-4}$ ( $6.2 \times 10^{-4}$ )                                                | -42~-47        | $10^2 \sim 10^3$                 |                                                                                                           |                |                                  |
|              | 200             | 1.30 (1.15)                                                                                  | 50~55          | $10^4 \sim 10^5$                 | 0.36 (0.32)                                                                                  | -58~-62        | $10^3 \sim 10^4$                 | 1.26 (1.12)<br>83%                                                                                        | 7~10           | $10^5 \sim 10^6$                 |
|              | 250             | 0.94 (0.81)                                                                                  | 28~32          | $10^3 \sim 10^4$                 | 0.17 (0.13)                                                                                  | -44~-47        | $10^2 \sim 10^3$                 |                                                                                                           |                |                                  |
| <b>Fu-Cl</b> | 150             | $1.0 \times 10^{-2}$ ( $9.2 \times 10^{-3}$ )                                                | 44~48          | $10^2 \sim 10^3$                 | $2.0 \times 10^{-3}$ ( $1.6 \times 10^{-3}$ )                                                | -40~-45        | $10^2 \sim 10^3$                 |                                                                                                           |                |                                  |
|              | 200             | $1.1 \times 10^{-2}$ ( $8.9 \times 10^{-3}$ )                                                | 29~34          | $10^4 \sim 10^5$                 | $2.7 \times 10^{-3}$ ( $2.2 \times 10^{-3}$ )                                                | -39~-44        | $10^2 \sim 10^3$                 | $1.2 \times 10^{-2}$ ( $9.3 \times 10^{-3}$ )<br>76%                                                      | 10~15          | $10^3 \sim 10^4$                 |
|              | 250             | $5.2 \times 10^{-3}$ ( $4.6 \times 10^{-3}$ )                                                | 27~32          | $10^3 \sim 10^4$                 | $1.7 \times 10^{-3}$ ( $1.0 \times 10^{-3}$ )                                                | -33~-39        | $10^2 \sim 10^3$                 |                                                                                                           |                |                                  |

<sup>a</sup>The devices were measured under ambient conditions. <sup>b</sup>Thermal annealing temperature. <sup>c</sup>Maximum electron mobility calculated from the saturation regime. <sup>d</sup>Average electron mobility calculated from at least 15 devices. <sup>e</sup>Threshold voltage. <sup>f</sup>Current on/off ratio. <sup>g</sup>Maximum hole mobility calculated from the saturation regime. <sup>h</sup>Average hole mobility calculated from at least 15 devices. <sup>i</sup>Reliability factor.

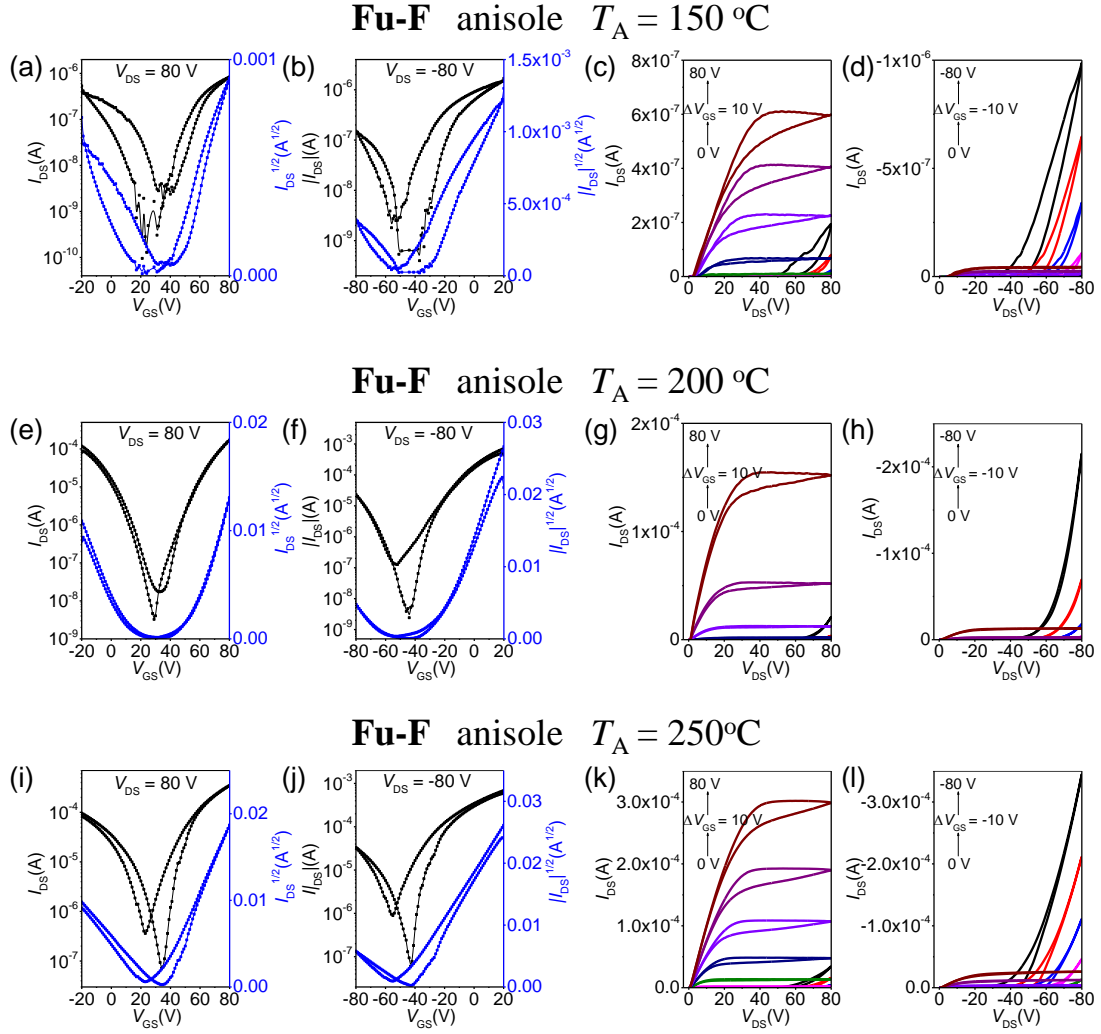

**Figure S3.** Typical transfer (a, b, e, f, i, j) and output (c, d, g, h, k, l) curves of the spin-coated OTFTs based on **Fu-F**. Polymer films were prepared from anisole solution on bare Si/SiO<sub>2</sub> substrates and annealed at 150, 200 or 250 °C for 10 min under an inert atmosphere.

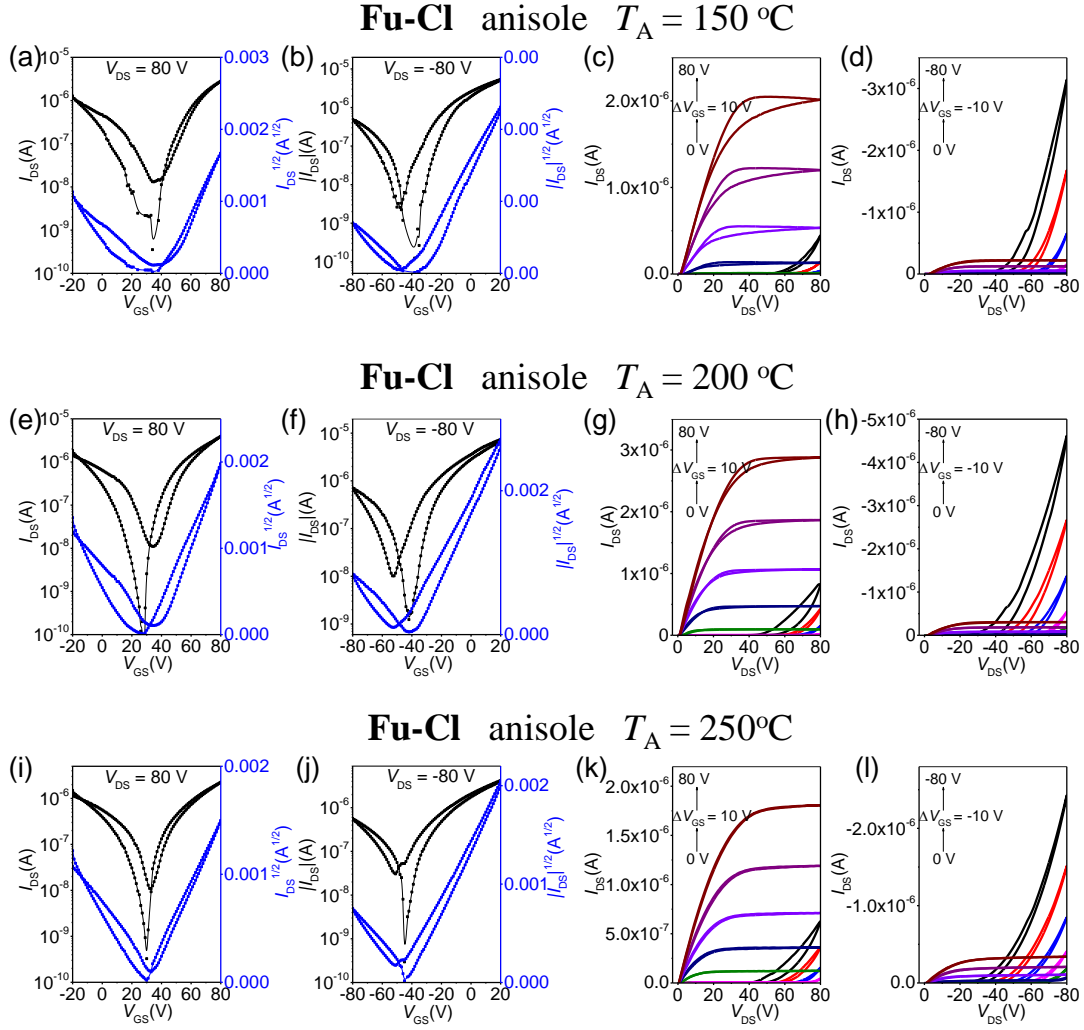

**Figure S4.** Typical transfer (a, b, e, f, i, j) and output (c, d, g, h, k, l) curves of the spin-coated OTFTs based on **Fu-Cl**. Polymer films were prepared from anisole solution on bare Si/SiO<sub>2</sub> substrates and annealed at 150, 200 or 250 °C for 10 min under an inert atmosphere.

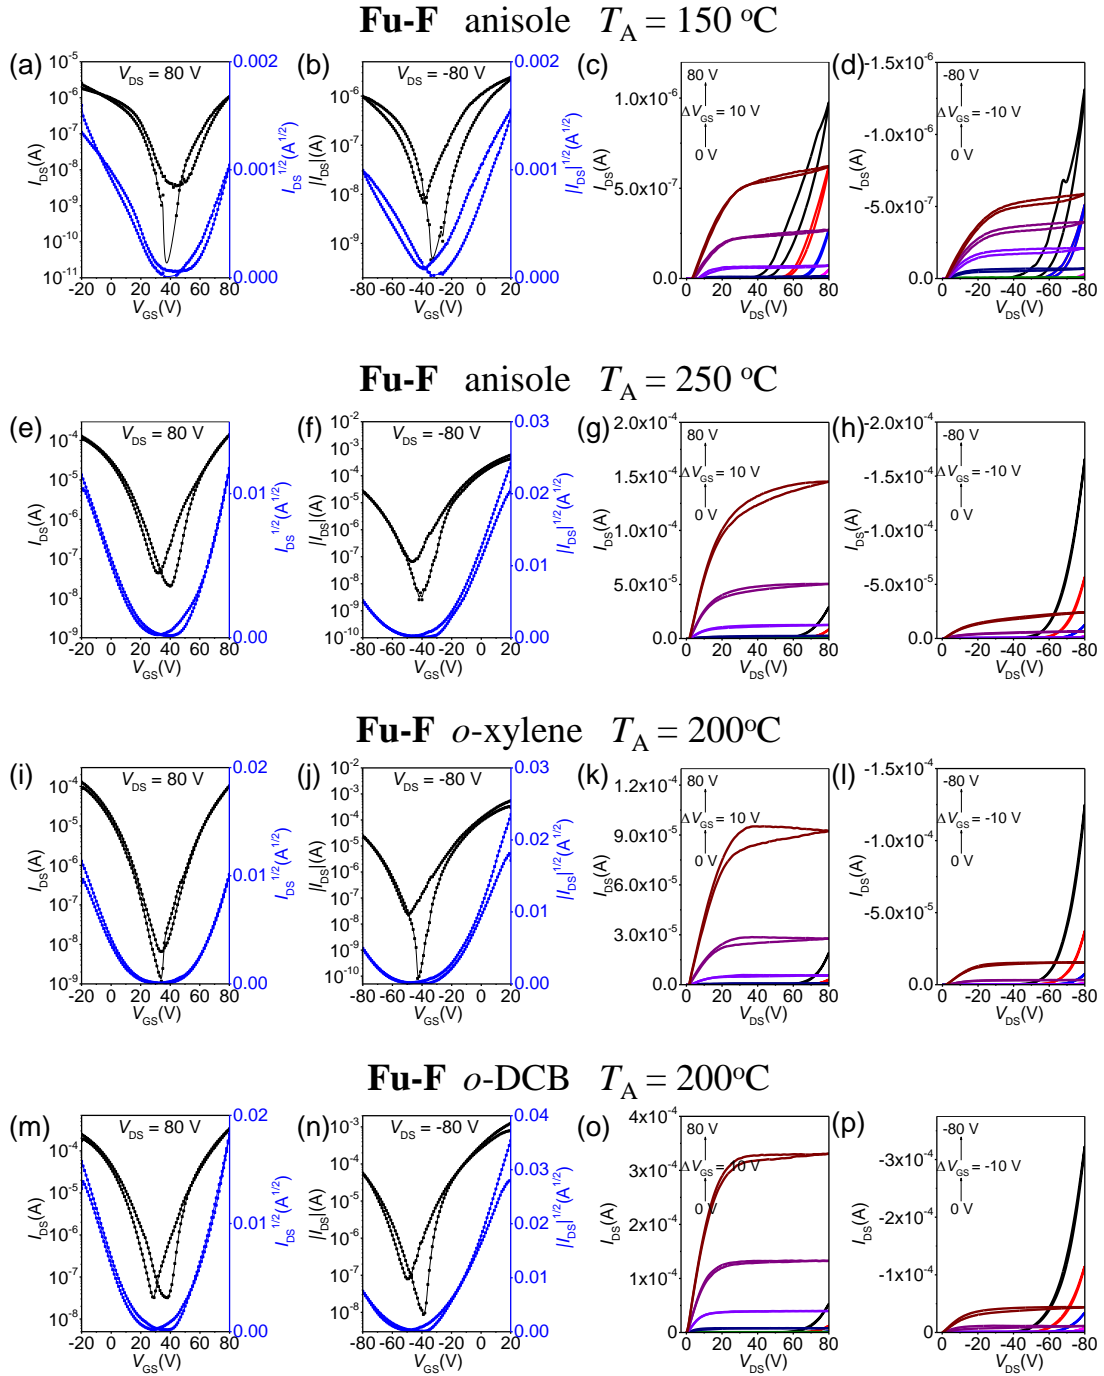

**Figure S5.** Typical transfer (a, b, e, f, i, j, m, n) and output (c, d, g, h, k, l, o, p) curves of the bar-coated OTFTs based on **Fu-F**. Polymer films were prepared from anisole, *o*-xylene or *o*-DCB solution on bare Si/SiO<sub>2</sub> substrates and annealed at 150, 200 or 250 °C for 10 min under an inert atmosphere.

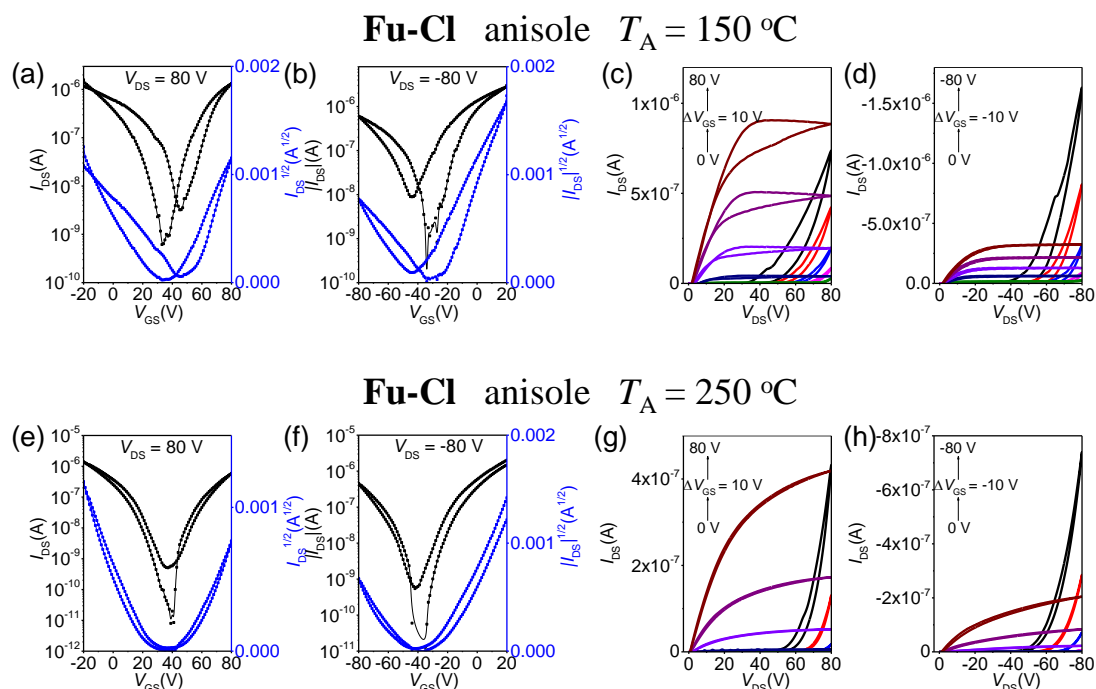

**Figure S6.** Typical transfer (a, b, e, f) and output (c, d, g, h,) curves of the bar-coated OTFTs based on **Fu-Cl**. Polymer films were prepared from anisole solution on Si/SiO<sub>2</sub> substrates and annealed at 150 °C or 250 °C for 10 min under an inert atmosphere.

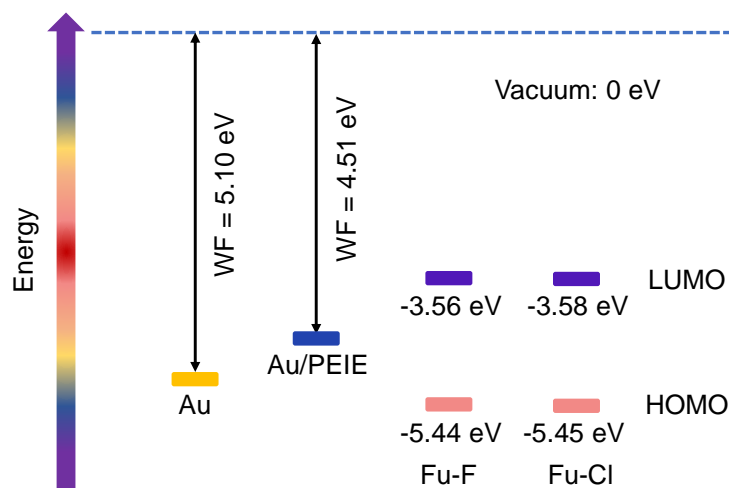

**Figure S7.** Energy level diagrams of Au, Au modified with PEIE, and the thin films of **Fu-F** and **Fu-Cl**. The work function of Au and Au modified with PEIE were measured by Kelvin probe microscopy.<sup>4</sup>

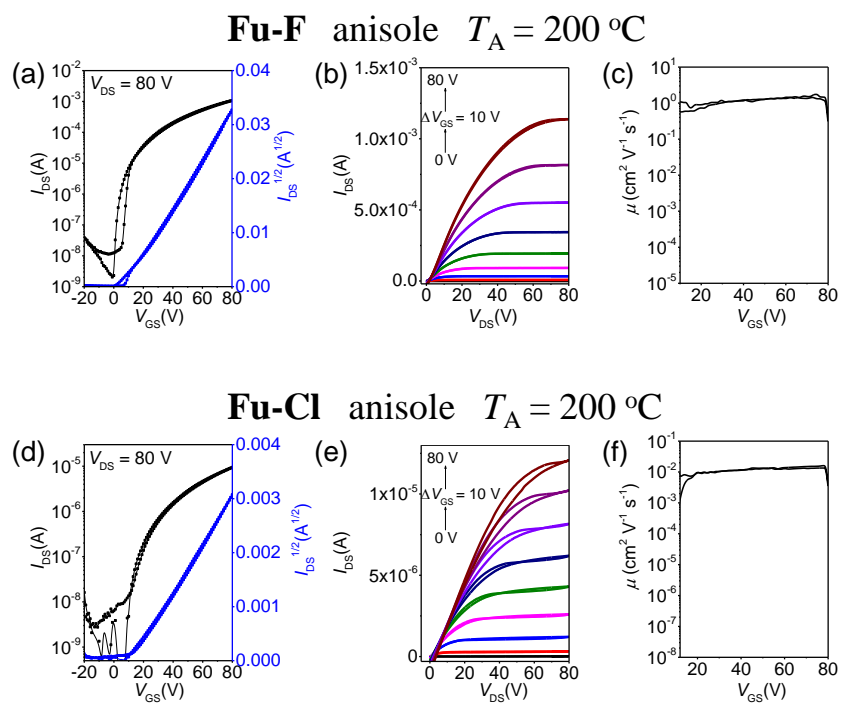

**Figure S8.** Typical transfer (a, d), output (b, e) curves and saturation mobility versus  $V_{GS}$  (c, f) of the spin-coated OTFTs based on **Fu-F** (a, b, c) and **Fu-Cl** (d, e, f). Polymer films were prepared from anisole solution on 0.08wt% PEIE-modified substrates and annealed at 200°C for 10 min under an inert atmosphere.

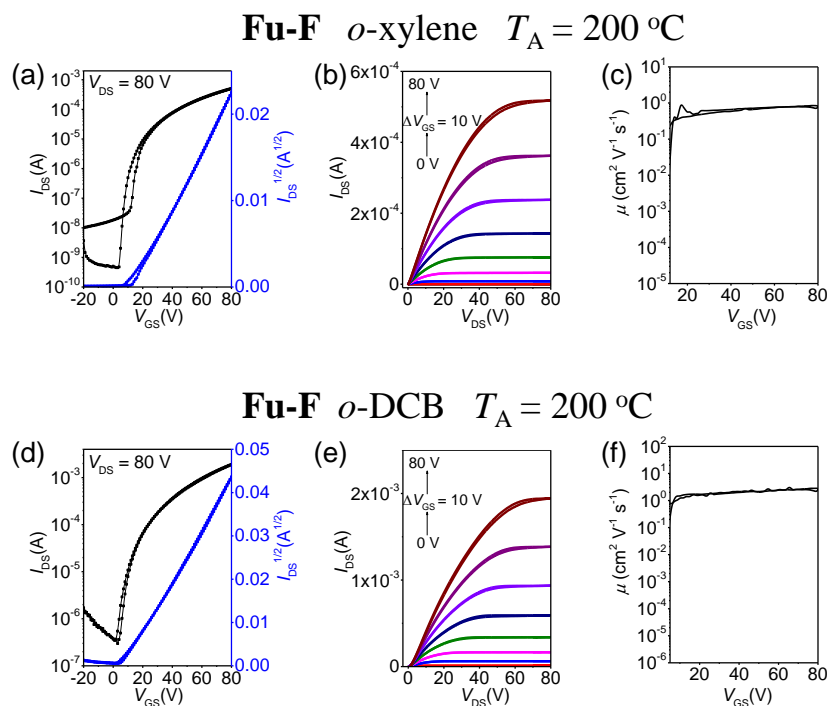

**Figure S9.** Typical transfer (a, d), output (b, e) curves and saturation mobility versus  $V_{GS}$  (c, f) of the bar-coated OTFTs based on **Fu-F**. Polymer films were prepared from *o*-xylene (a, b, c) or *o*-DCB (d, e, f) solution on 0.08wt% PEIE-modified substrates and annealed at 200°C for 10 min under an inert atmosphere.

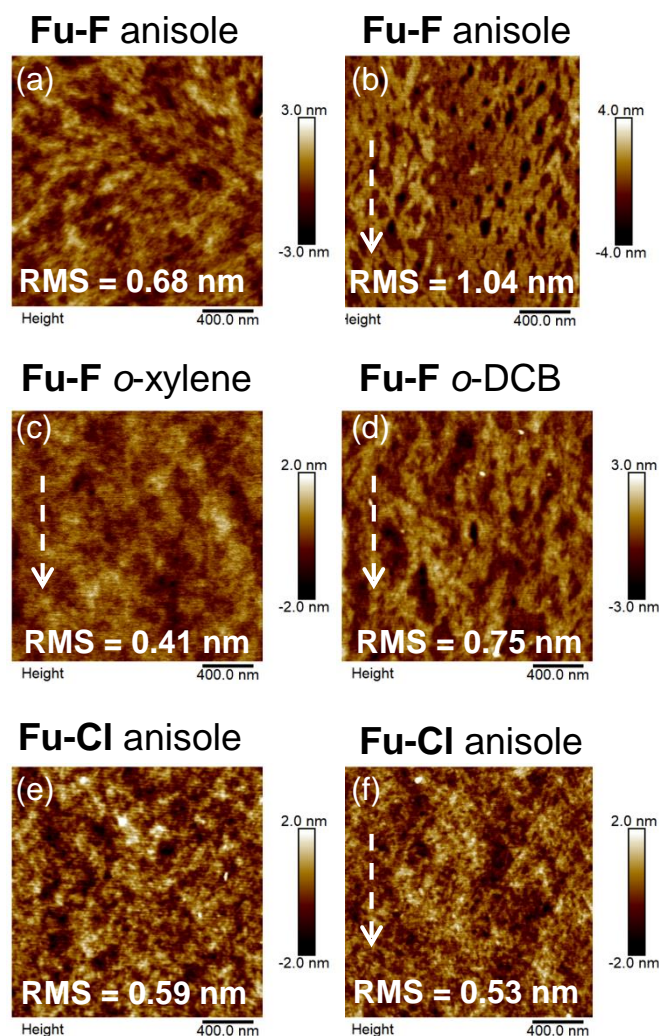

**Figure S10.** AFM height images ( $2\ \mu\text{m} \times 2\ \mu\text{m}$ ) of the spin-coated (a, e) and bar-coated (b, c, d, f) polymer films from anisole, *o*-xylene and *o*-DCB solutions. Thin films were prepared on 0.08wt% PEIE-modified Si/SiO<sub>2</sub> substrates and annealed at 200 °C for 10 min under an inert atmosphere. The arrows in the images denote bar-coating direction.



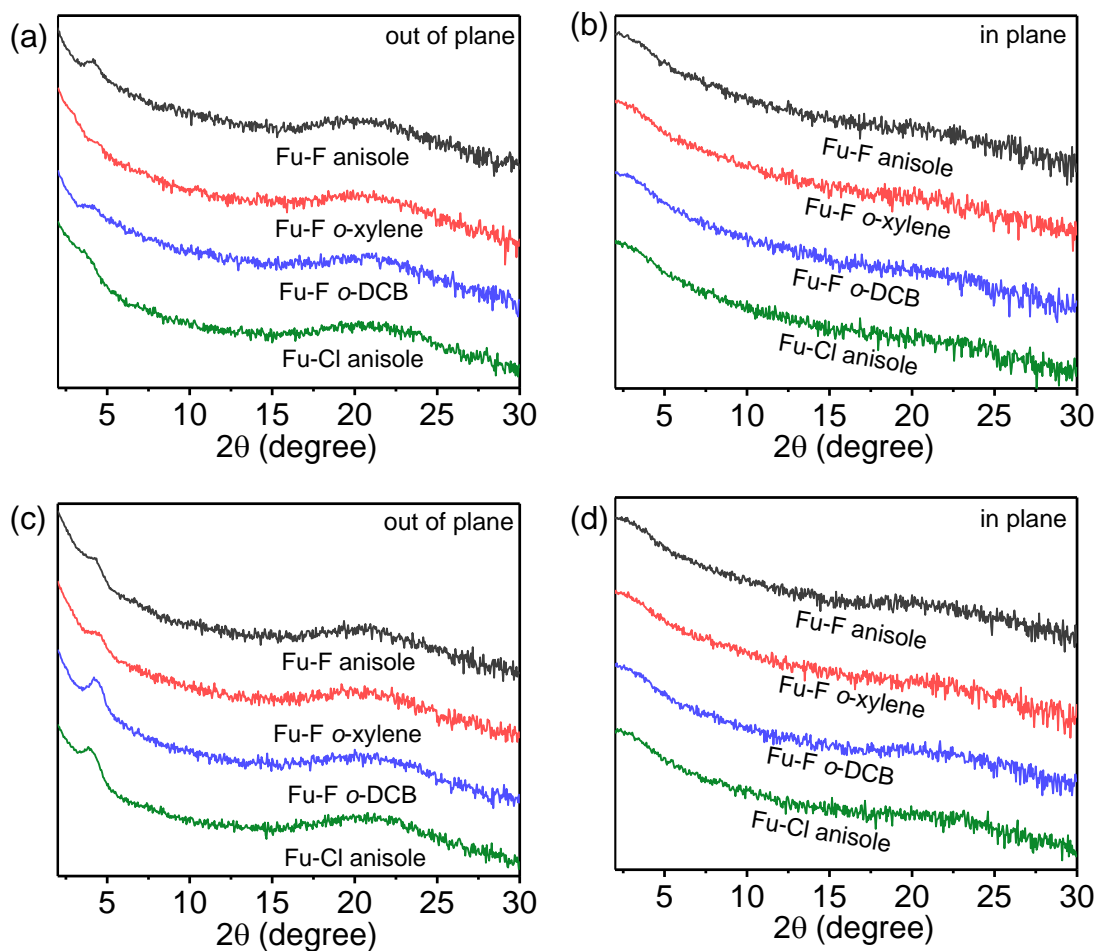

**Figure S11.** Out-of-plane (a, c) and in-plane (b, d) XRD spectra of the bar-coated polymer films from anisole, *o*-xylene and *o*-DCB solutions. The coating direction of the film is parallel to the incident light. Thin films were prepared on bare Si/SiO<sub>2</sub> substrates (a, b) and 0.08wt% PEIE-modified substrates (c, d), and thermally annealed at 200°C for 10 min under an inert atmosphere.

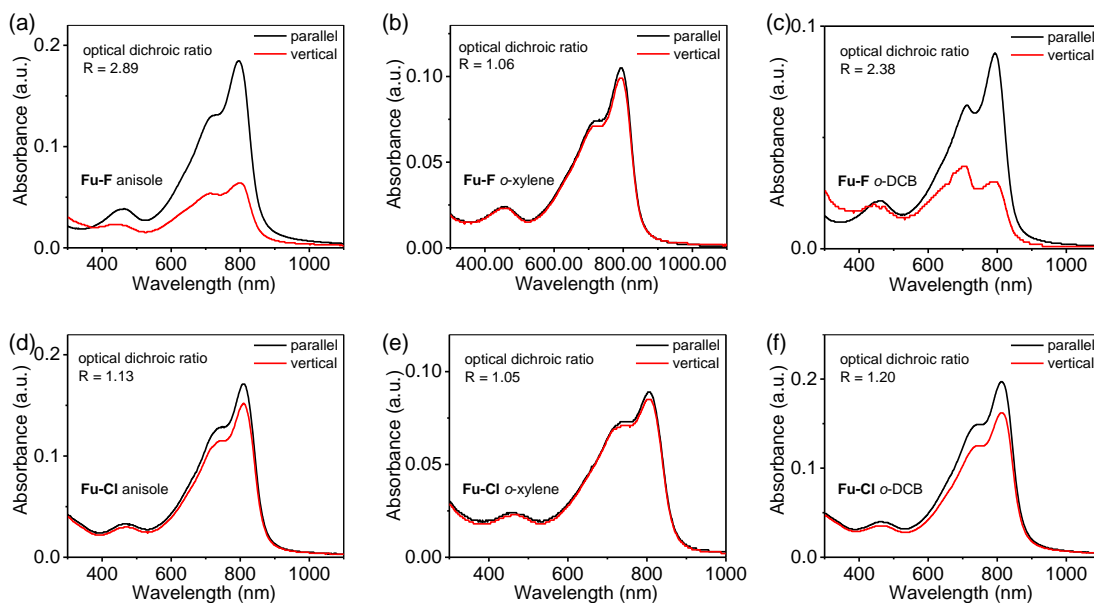

**Figure S12.** Linearly polarized absorption spectra of bar-coated films of **Fu-F** (a, b, c) and **Fu-Cl** (d, e, f) in parallel direction (black line) and vertical direction (red line) prepared from anisole (a, d), *o*-xylene (b, e) and *o*-DCB (c, f) solutions.

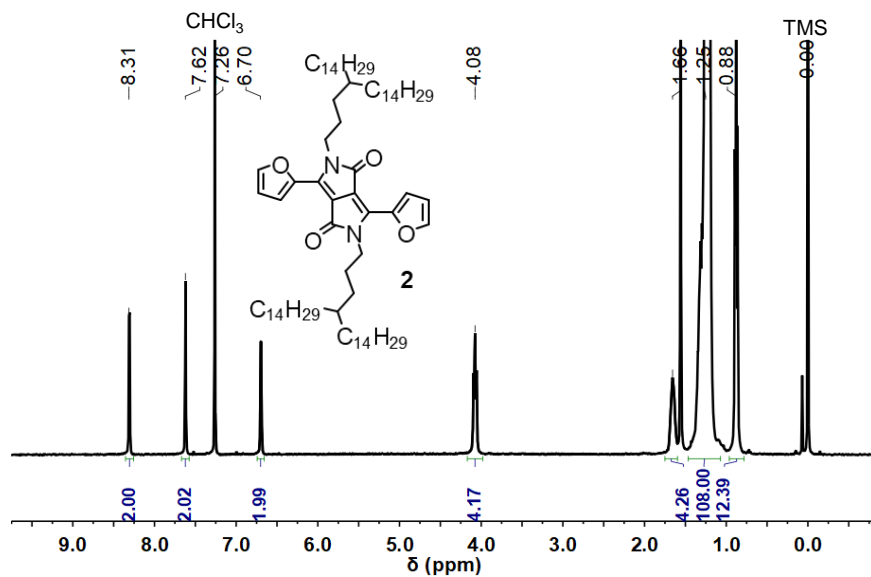

**Figure S13.**  $^1\text{H}$  NMR spectrum (400 MHz,  $\text{CDCl}_3$ , 25  $^\circ\text{C}$ ) of compound **2**.

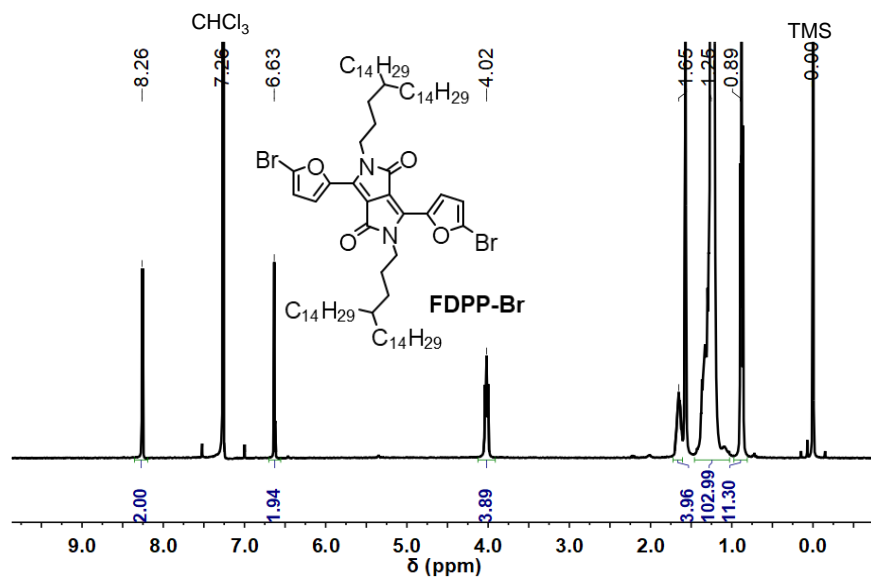

**Figure S14.** <sup>1</sup>H NMR spectrum (400 MHz, CDCl<sub>3</sub>, 25 °C) of FDPP-Br.

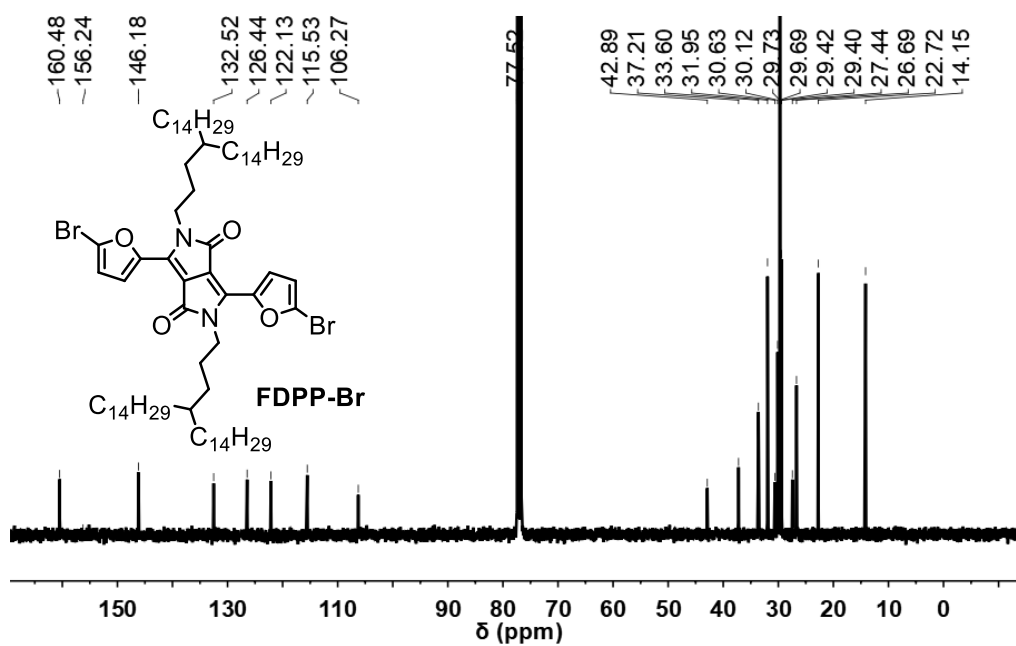

**Figure S15.** <sup>13</sup>C NMR spectrum (100 MHz, CDCl<sub>3</sub>, 25 °C) of FDPP-Br.

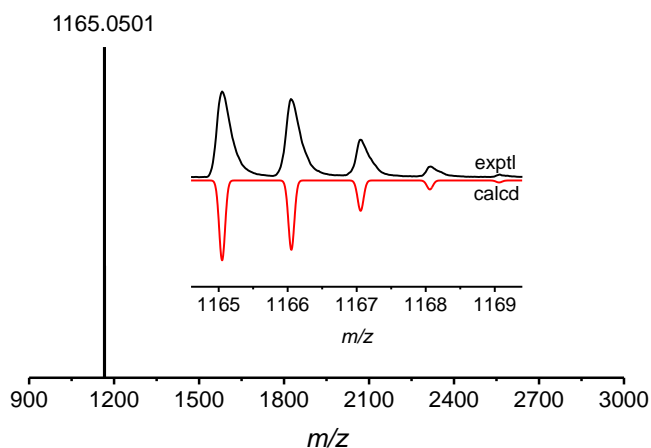

**Figure S16.** High-resolution MALDI-TOF mass spectrum of compound **2**.

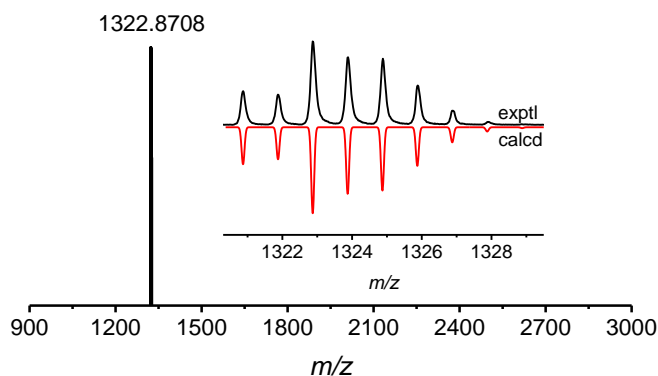

**Figure S17.** High-resolution MALDI-TOF mass spectrum of **FDPP-Br**.

## References

- [1] Y. Li, P. Sonar, S. P. Singh, W. Zeng, M. S. Soh, *J. Mater. Chem.* **2011**, *21*, 10829.
- [2] Y. Gao, X. Zhang, H. Tian, J. Zhang, D. Yan, Y. Geng, F. Wang, *Adv. Mater.*, **2015**, *27*, 6753-6759.
- [3] Y. Sui, Y. Shi, Y. Deng, R. Li, J. Bai, Z. Wang, Y. Dang, Y. Han, N. Kirby, L. Ye, Y. Geng, *Macromolecules*, **2020**, *53*, 10147-10154.
- [4] J. Bai, Y. Jiang, Z. Wang, Y. Sui, Y. Deng, Y. Han and Y. Geng, *Adv. Electron. Mater.*, **2019**, *6*, 1901002.
